# Supplementary material
Source: PubMed Central journal article supplement (PMC10234105)
Supplement: NIHMS1891705-supplement-1.pdf [file NIHMS1891705-supplement-1.pdf]

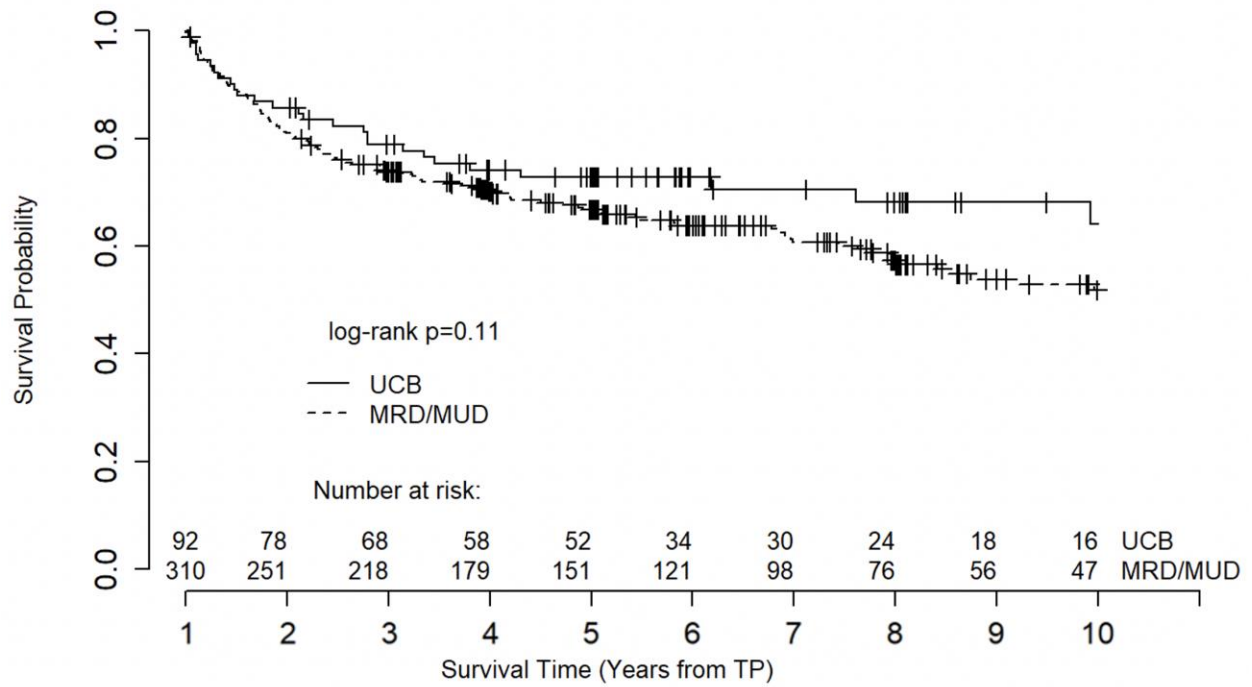

Supplemental Figure 1. Unadjusted overall survival after excluding for patients who relapsed or underwent salvage within 1 year of transplantation.
